# Supplementary material for: IFNγ synergies with cold atmospheric plasma in triggering colorectal cancer cell ferroptosis via the IFNγ/IFNR2/APC/TCF4/GPX4 axis
Source: publisher site journal article supplement (doi:10.18632/aging.204985), 2023-09-04
Supplement: Supplementary file [file aging-v15i17-204985-supplementary-material-SD1.pdf]

**SUPPLEMENTARY FIGURES**

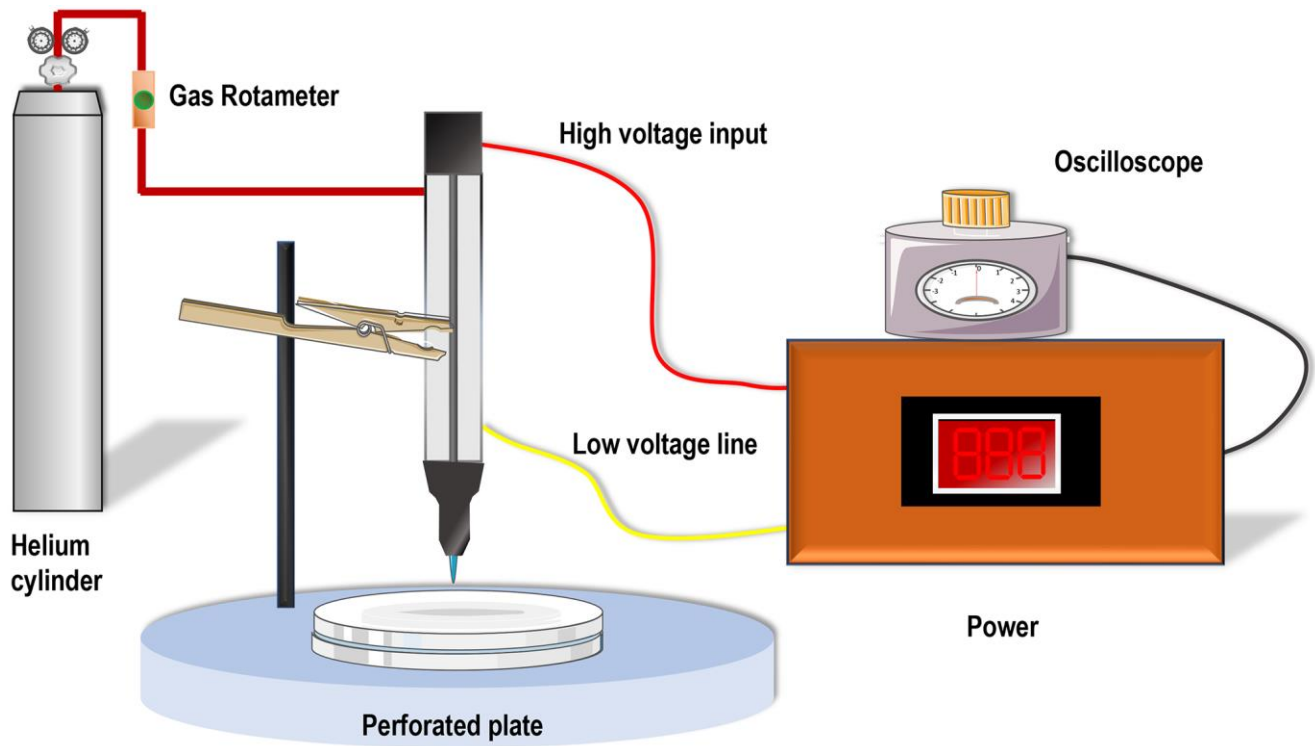

**Supplementary Figure 1. Schematic diagram showing the equipment for CAP ejection.**

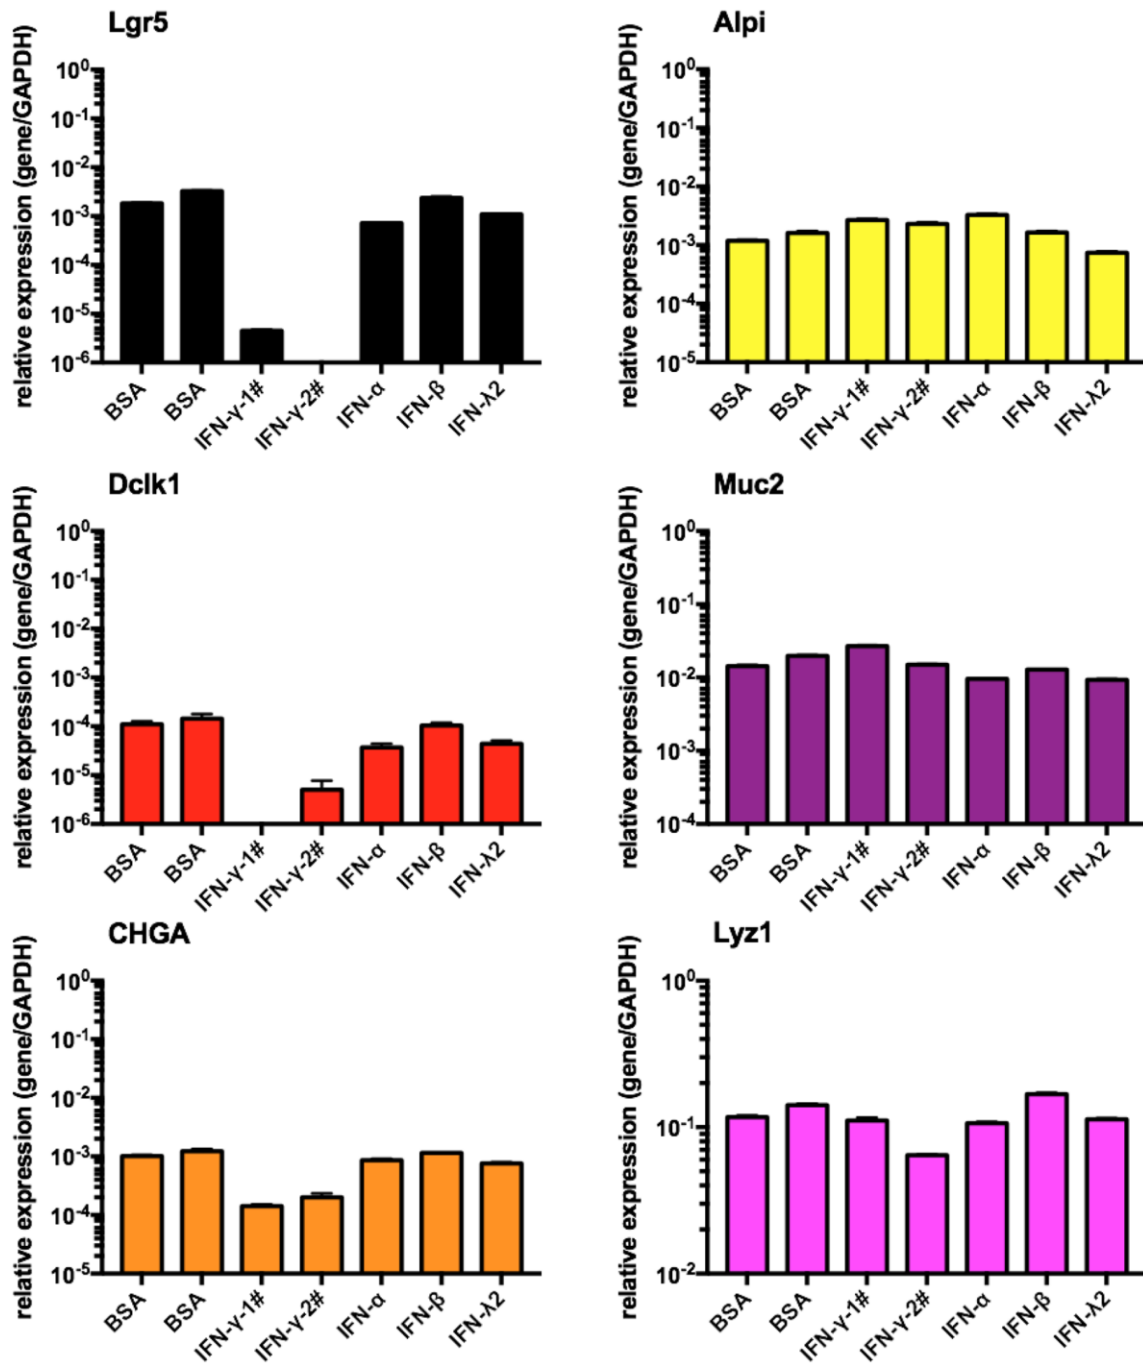

Supplementary Figure 2. Canonical marker gene expression in stem cells, enterocytes, Tuft cells, Goblet cells, enteroendocrine cells and Paneth cells in response to IFN $\alpha/\beta/\gamma/\lambda 2$ . IFN $\gamma$ -1, IFN $\gamma$ -2 were purchased from Abisin (#abs04123) and Yeasen (#91211ES10), respectively.

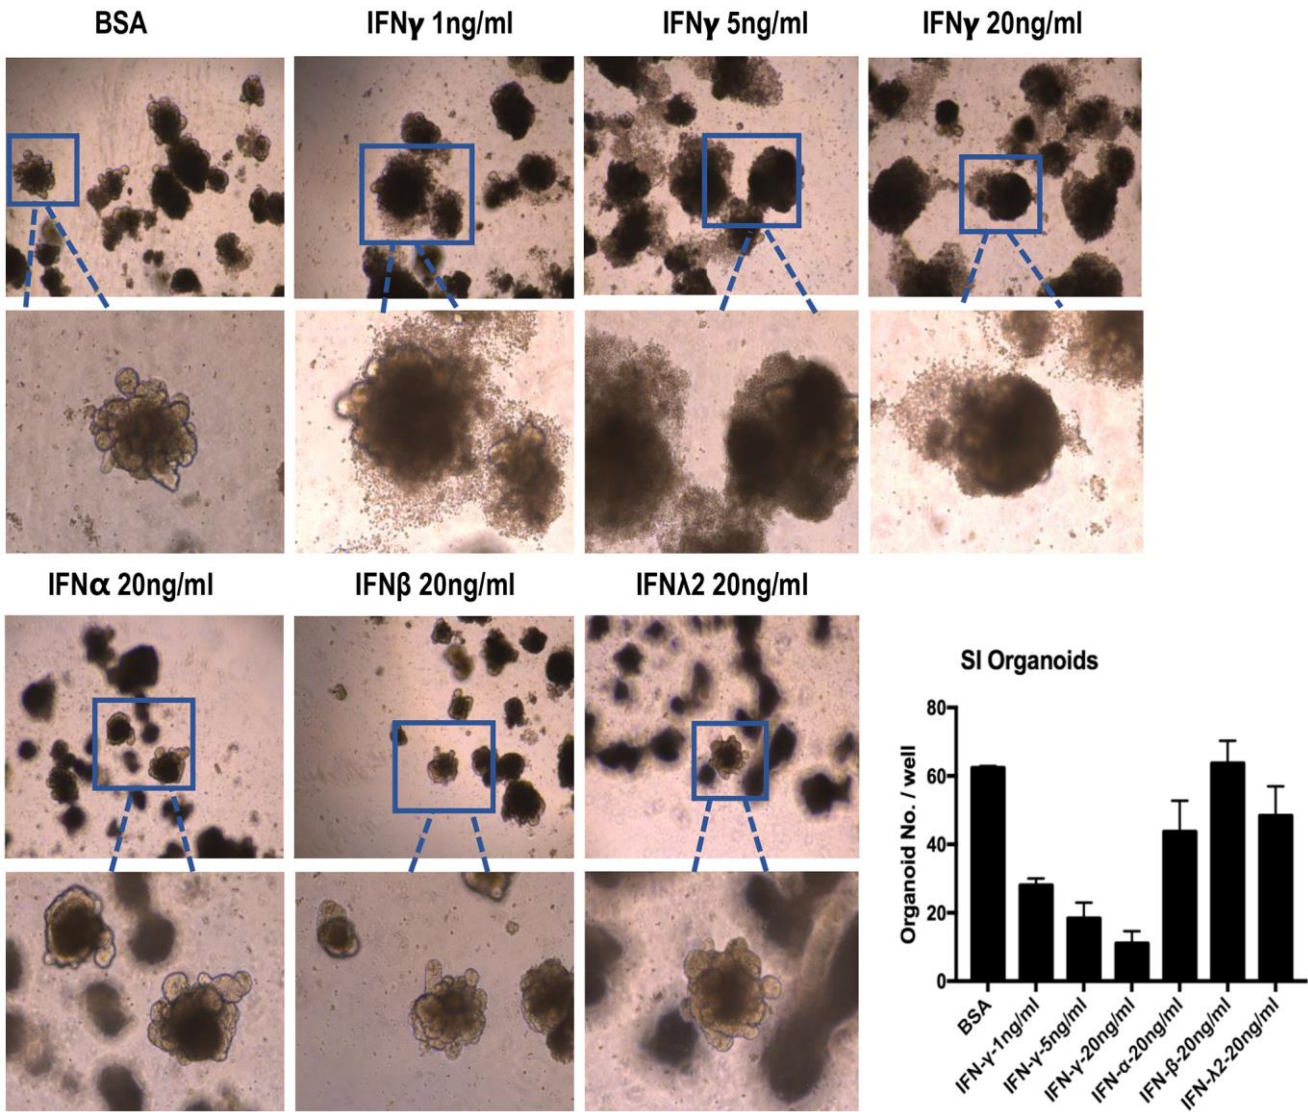

Supplementary Figure 3. The amount of SI spheroids in response to IFN $\alpha$ / $\beta$ / $\gamma$  under different concentrations.

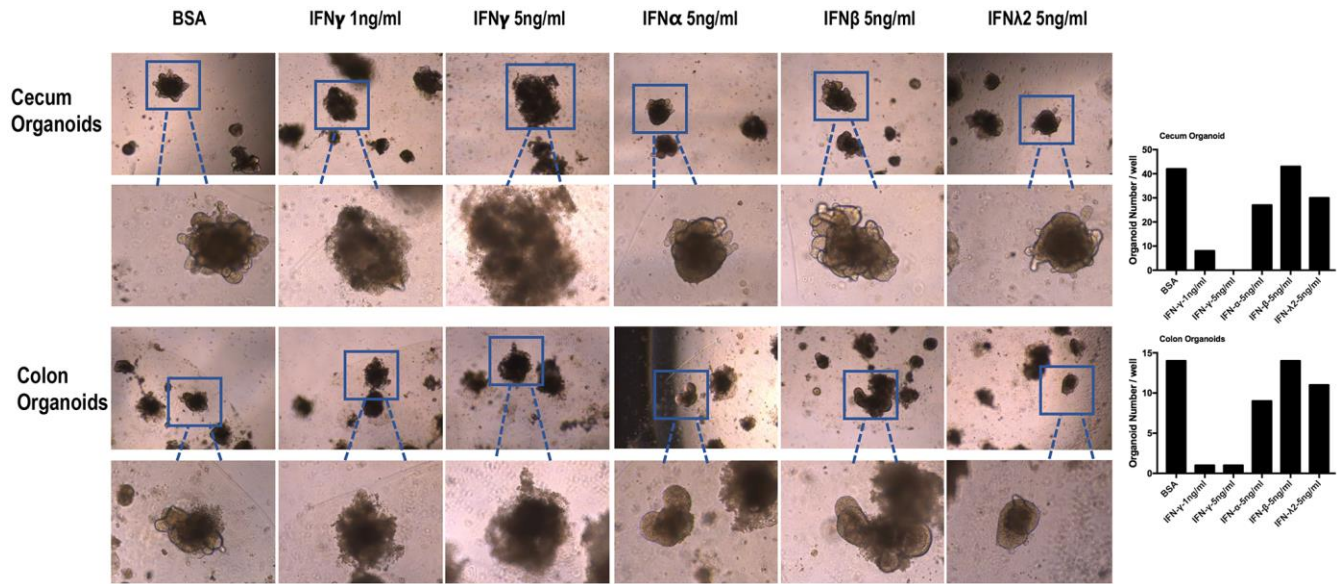

Supplementary Figure 4. The amount of cecum and colon spheroids in response to IFN $\alpha/\beta/\gamma$  under different concentrations.

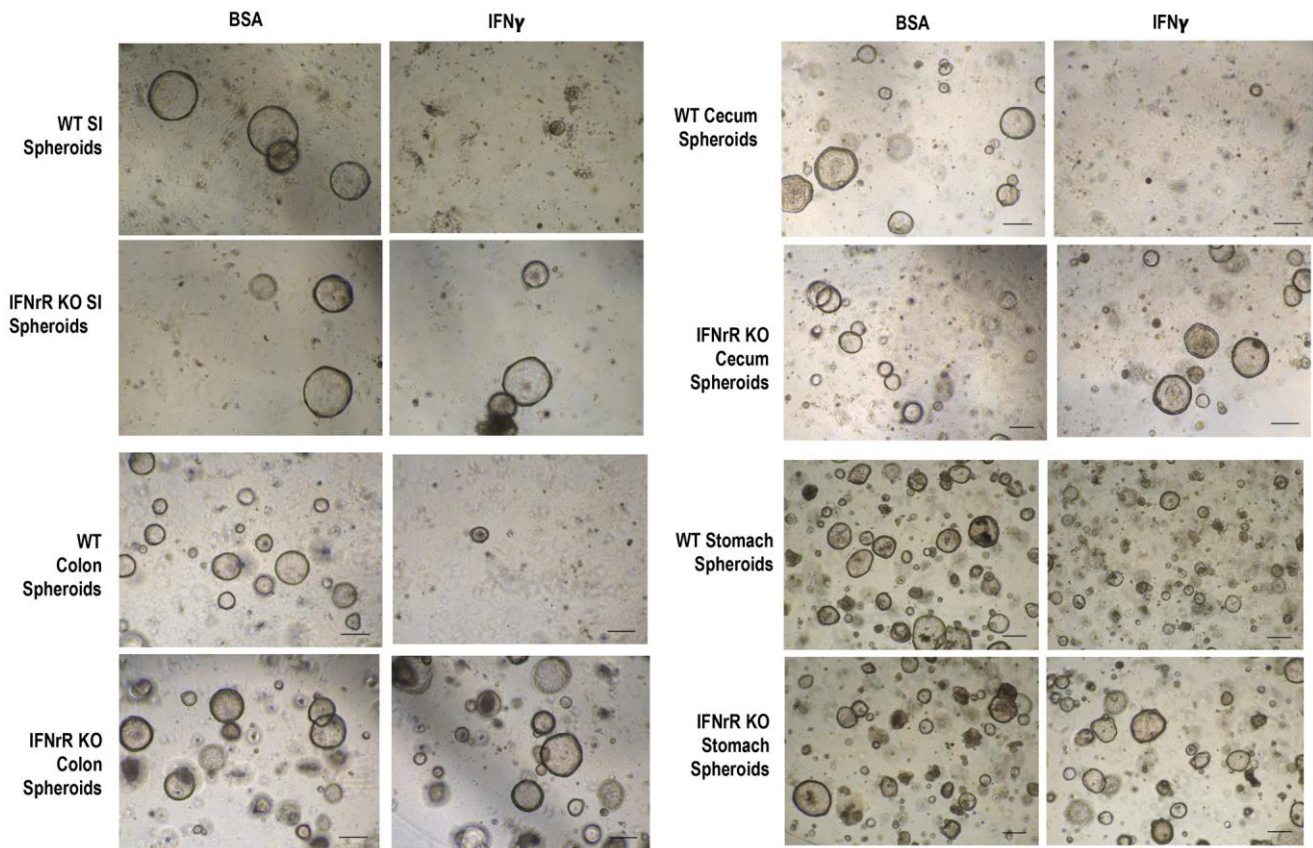

Supplementary Figure 5. Images of spheroids from different tissues in response to IFN $\gamma$  when knocking down *IFNGR1/2*.

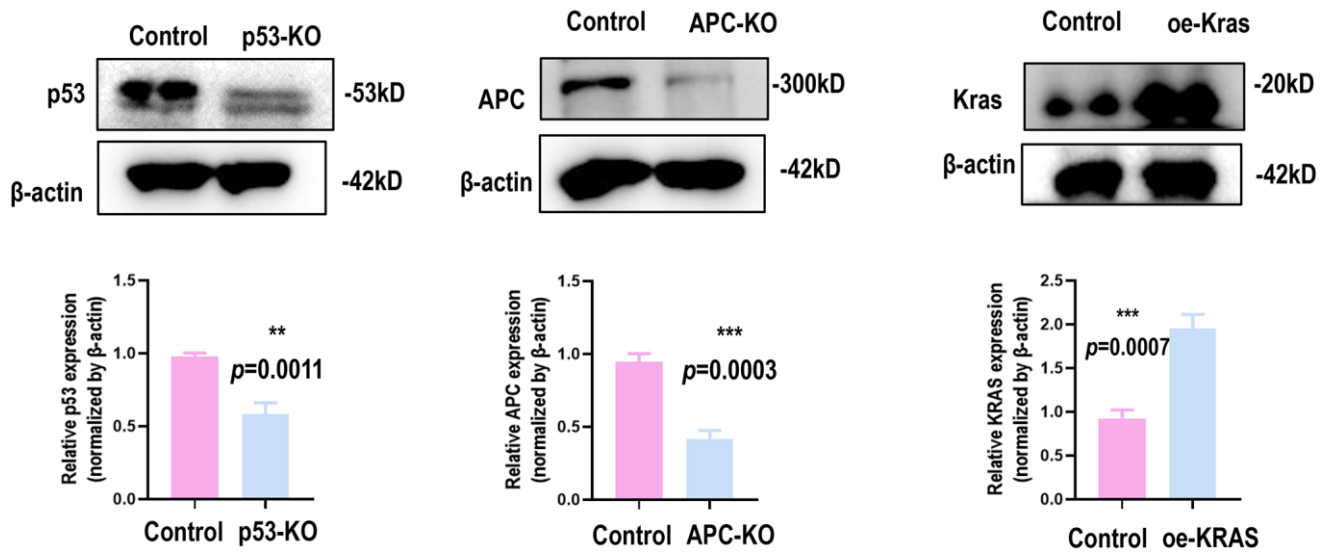

Supplementary Figure 6. The knockout of *p53*, *APC* or the hyperactivation of *Kras*.
